# Supplementary material for: FDW028, a novel FUT8 inhibitor, impels lysosomal proteolysis of B7-H3 via chaperone-mediated autophagy pathway and exhibits potent efficacy against metastatic colorectal cancer
Source: PubMed Central journal article supplement (PMC10400579; doi:10.1038/s41419-023-06027-0), 2023-08-03
Supplement: 41419_2023_6027_MOESM2_ESM.pdf [file 41419_2023_6027_MOESM2_ESM.pdf]

## Supplementary materials

### Methods

**Synthesis of series of the derivatives.** All reagents in this paper were purchased from commercial sources and used as received. Bruker AV-400 instrument and Nuclear Magnetic Resonance Spectrometer DD2-600M were utilized to measure all  $^1\text{H}$  NMR and  $^{13}\text{C}$  NMR spectra. Deuterated solvents were used to dissolve all compounds with tetramethylsilane (TMS) as internal standard. High resolution electrospray ionization (ESI) mass analysis was recorded by Waters Xevo G2-XS ToF high resolution mass spectrometer. LC-ESI-MS analysis was recorded by Agilent 1260-6120 Liquid chromatograph mass spectrometer. The compounds were separated using 200-300 mesh column chromatography silica gel, which was produced by Qingdao Ocean Chemical Works. The amount of silica gel was 50-100 times of the amount of the separated samples. The whole elution process was tracked by thin layer chromatography (TLC). The silica gel 60 GF254 produced by Qingdao Ocean Chemical Works was used for TLC. The silica gel 60 GF254 was detected by ultraviolet radiation at 254 nm wavelength. The integrated synthetic scheme was shown in scheme 1-4.

#### 1. Synthesis of compound D2-1a-f.

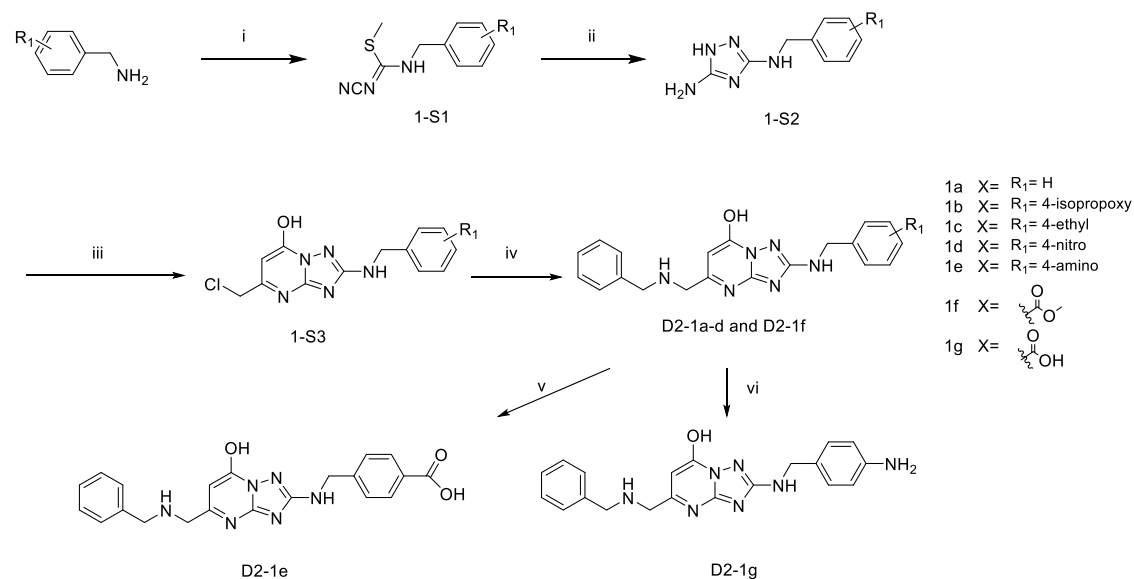

**Scheme 1. General Synthesis Methods of compound D2-1a-f.**

(i) dimethyl cyanocarbonyldithioate, Isopropyl alcohol, r.t., 1h; (ii) Hydrazinium hydroxide,

EtOH, 80 °C, 4 h; (iii) Ethyl-4-chloroacetoacet-ate, AcOH, 90 °C, 10h; (iv) Phenylmethanamine, 90 °C, 0.5h; (v) potassium hydroxide, water and tetrahydrofuran, r.t., 2h; (vi) Zn powder and NH<sub>4</sub>Cl, MeOH and DMF, 80 °C, 6h.

**2-(benzylamino)-5-((benzylamino)methyl)-[1,2,4]triazolo[1,5-a]pyrimidin-7-ol (D2-1a).**

**Step 1:** To a stirred solution of dimethyl cyanocarbonimidodithioate (0.292 g, 2.00 mmol) in IPA (15 mL) was added phenylmethanamine (0.214 g, 2.00 mmol). After stirring for 1 h at room temperature, a precipitate formed. Then the precipitate was collected by filtration and washed with cold ethyl acetate, then pentane and was dried under reduced pressure to afford pure **1a-S1** (0.350 g, 85%) as white solid. <sup>1</sup>H NMR (400 MHz, DMSO) δ 8.89 (s, 1H), 7.35 (dd, *J* = 9.8, 4.9 Hz, 2H), 7.29 (d, *J* = 7.2 Hz, 3H), 4.49 (d, *J* = 4.5 Hz, 2H), 2.62 (s, 3H).

**Step 2:** To a solution of **1a-S1** (0.350 g, 1.71 mmol) in EtOH (50 mL) was added Hydrazinium hydroxide (0.259 g, 5.13 mmol). After stirring for 4 h at 80 °C. The mixture was diluted with H<sub>2</sub>O (15mL) and extracted with EA (3 × 8 mL), and the combined organic phases were washed with brine, dried over Na<sub>2</sub>SO<sub>4</sub>, filtered, concentrated *in vacuo* and crystallized by ethanol to give **1a-S2** (0.284 g, 88%) as white solid. <sup>1</sup>H NMR (400 MHz, DMSO-*d*<sub>6</sub>) δ 7.37-7.24 (m, 4H), 7.22-7.16 (m, 1H), 6.34-5.96 (m, 1H), 4.22 (d, *J* = 6.2 Hz, 2H), 1.24 (d, *J* = 3.1 Hz, 1H).

**Step 3:** To a solution of **1a-S2** (0.284 g, 1.5 mmol) in AcOH (30 mL) was added Ethyl-4-chloroacetoacet-ate (0.295 g, 1.8 mmol). After stirring for 10 h at 90 °C, the reaction mixture was cooled to room temperature and cautiously poured over ice water, obtaining a precipitate that was filtered. The precipitate was crystallized by AcOH to give **1a-S3** (0.195 g, 68%) as white solid. <sup>1</sup>H NMR (400 MHz, DMSO-*d*<sub>6</sub>) δ 7.36-7.32 (m, 3H), 7.30 (d, *J* = 7.8 Hz, 1H), 7.26-7.19 (m, 1H), 6.01 (d, *J* = 1.5 Hz, 1H), 4.59 (s, 2H), 4.41 (d, *J* = 5.1 Hz, 2H).

**Step 4:** A 10 mL round bottom flask was charged with **1a-S3** (0.100 g, 0.34 mmol) and phenylmethanamine (1.5 mL). After stirring for 0.5h at 90 °C, the reaction mixture was cooled to room temperature and cautiously poured over ethyl acetate. Petroleum ether was added to the reaction mixture until a precipitate is formed. The precipitate was

crystallized by EtOH to afford **D2-1a** (0.072 g, 58%) as white solid. <sup>1</sup>H NMR (600 MHz, DMSO-*d*<sub>6</sub>) δ 7.57 (d, *J* = 6.9 Hz, 2H), 7.41 (d, *J* = 7.0 Hz, 3H), 7.35 (d, *J* = 7.7 Hz, 2H), 7.31 (t, *J* = 7.5 Hz, 2H), 7.23 (d, *J* = 7.3 Hz, 1H), 6.11 (s, 1H), 4.42 (d, *J* = 6.1 Hz, 2H), 4.21 (s, 2H), 4.11 (s, 2H).

**5-((benzylamino)methyl)-2-((4-isopropoxybenzyl)amino)-[1,2,4]triazolo[1,5-a]pyrimidin-7-ol (D2-1b)**. The title compound was synthesized using the same procedure as that used for **D2-1a** except that (4-isopropoxyphenyl)methanamine was used instead of phenylmethanamine. White solid; yield 35%. <sup>1</sup>H NMR (400 MHz, DMSO-*d*<sub>6</sub>) δ 7.52-7.45 (m, 2H), 7.34 (dd, *J* = 2.3, 5.0 Hz, 3H), 7.20-7.13 (m, 2H), 6.81-6.74 (m, 2H), 6.03 (s, 1H), 4.48 (p, *J* = 6.0 Hz, 1H), 4.25 (d, *J* = 4.3 Hz, 2H), 4.13 (s, 2H), 4.02 (s, 2H), 1.15 (d, *J* = 6.0 Hz, 6H).

**5-((benzylamino)methyl)-2-((4-ethylbenzyl)amino)-[1,2,4]triazolo[1,5-a]pyrimidin-7-ol (D2-1c, FDW028)**. The title compound was synthesized using the same procedure as that used for **D2-1a** except that (4-ethylphenyl)methanamine was used instead of phenylmethanamine. White solid; yield 37%. <sup>1</sup>H NMR (600 MHz, DMSO-*d*<sub>6</sub>) δ 7.55 (d, *J* = 7.0 Hz, 2H), 7.41 (d, *J* = 7.3 Hz, 2H), 7.31 (d, *J* = 6.5 Hz, 1H), 7.25 (d, *J* = 7.7 Hz, 2H), 7.14 (d, *J* = 7.7 Hz, 2H), 6.07 (s, 1H), 4.37 (d, *J* = 6.1 Hz, 2H), 4.19 (s, 2H), 4.07 (s, 2H), 2.56 (q, *J* = 7.6 Hz, 2H), 1.14 (t, *J* = 7.6 Hz, 3H). <sup>13</sup>C NMR (151 MHz, DMSO-*d*<sub>6</sub>) δ 155.32, 150.65, 142.60, 137.50, 132.47, 130.50, 129.31, 129.01, 128.00, 127.55, 101.58, 50.39, 47.50, 45.72, 28.27, 16.19. HRMS (ESI) *m/z*: calculated for C<sub>22</sub>H<sub>24</sub>N<sub>6</sub>O [M + H]<sup>+</sup> 389.2084 found 389.2089.

**5-((benzylamino)methyl)-2-((4-nitrobenzyl)amino)-[1,2,4]triazolo[1,5-a]pyrimidin-7-ol (D2-1d)**. The title compound was synthesized using the same procedure as that used for **D2-1a** except that (4-nitrophenyl)methanamine was used instead of phenylmethanamine. White solid; yield 32%. <sup>1</sup>H NMR (400 MHz, DMSO-*d*<sub>6</sub>) δ 8.24-8.17 (m, 2H), 7.62-7.59 (m, 2H), 7.58-7.54 (m, 2H), 7.43 (dd, *J* = 2.1, 5.1 Hz, 3H), 6.11 (s, 1H), 4.55 (d, *J* = 5.7 Hz, 2H), 4.22 (s, 2H), 4.12 (s, 2H).

**2-((4-aminobenzyl)amino)-5-((benzylamino)methyl)-[1,2,4]triazolo[1,5-a]pyrimidin-7-ol (D2-1e)**. Add Zn powder (0.110 g, 1.7 mmol) and NH<sub>4</sub>Cl (0.107 g, 2 mmol) to a suspension of **D2-1d** (0.100 g, 0.24 mmol) in MeOH (7 mL) and DMF (1 mL). Sonicate the

reaction for 5 minutes. Stir the reaction mixture at 80 °C for 6 hours. Remove the ZnO by filtration. Wash the ZnO extensively with MeOH. Concentrate the filtrate. Suspend the filtrate in DCM (5 mL) and stir until a precipitate formed. Collect the precipitate. Dry the precipitate in vacuo. White solid; yield 55%. <sup>1</sup>H NMR (400 MHz, DMSO-*d*<sub>6</sub>) δ 7.44-7.21 (m, 5H), 6.98 (d, *J* = 8.1 Hz, 2H), 6.49 (d, *J* = 7.9 Hz, 2H), 5.44 (s, 1H), 4.90 (s, 2H), 4.20 (d, *J* = 5.3 Hz, 2H), 3.38 (s, 2H).

**Methyl 4-(((5-((benzylamino) methyl)-7-hydroxy-[1,2,4]triazolo[1,5-a]pyrimidin-2-yl) amino)methyl)benzoate (D2-1f).** The title compound was synthesized using the same procedure as that used for **D2-1a** except that methyl 4-(aminomethyl)benzoate was used instead of phenylmethanamine. White solid; yield 29%. <sup>1</sup>H NMR (400 MHz, DMSO-*d*<sub>6</sub>) δ 7.94-7.89 (m, 2H), 7.54 (dd, *J* = 2.3, 7.3 Hz, 2H), 7.49 (d, *J* = 1.8 Hz, 1H), 7.47 (s, 1H), 7.43 (dq, *J* = 2.4, 2.9, 4.7 Hz, 3H), 6.09 (s, 1H), 4.50 (d, *J* = 6.0 Hz, 2H), 4.22 (s, 2H), 4.10 (s, 2H), 3.83 (s, 3H).

**4-(((5-((benzylamino)methyl)-7-hydroxy-[1,2,4]triazolo[1,5-a]pyrimidin-2-yl) amino)methyl)benzoic acid (D2-1g).** Add **D2-1f** (0.100 g, 0.24 mmol) to a mixture of potassium hydroxide (0.336 g, 6 mmol) in 6 mL of water and 2 mL of tetrahydrofuran. Stir the resulting suspension at room temperature for 2 h. Concentrate the solution by rotary evaporation to remove tetrahydrofuran and dilute to 20 mL volume with water. Take the mixture to pH 2 with concentrated hydrochloric acid. Dry the solid obtained in vacuo. White solid; yield 80%. <sup>1</sup>H NMR (400 MHz, DMSO-*d*<sub>6</sub>) δ 7.89 (d, *J* = 8.2 Hz, 2H), 7.53 (dd, *J* = 2.2, 7.4 Hz, 2H), 7.47-7.41 (m, 5H), 6.07 (s, 1H), 4.49 (d, *J* = 6.1 Hz, 2H), 4.21 (s, 2H), 4.08 (s, 2H).

## 2. Synthesis of compound D2-2a-e.

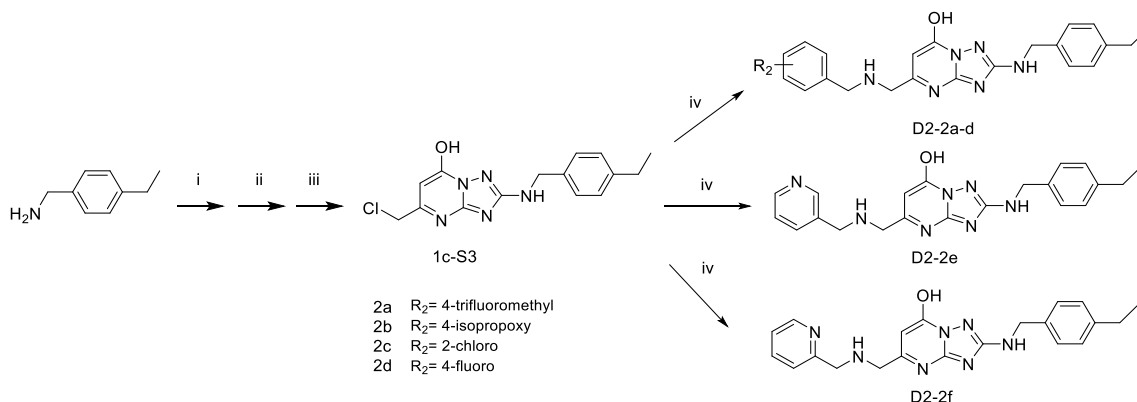

**Scheme 2. General Synthesis Methods of compound D2-2a-e.** (i) dimethyl cyanocarbonimidodithioate, Isopropyl alcohol, r.t., 1h; (ii) Hydrazinium hydroxide, EtOH, 80 °C, 4 h; (iii) Ethyl-4-chloroacetoacet-ate, AcOH, 90 °C, 10h; (iv) Phenylmethanamine, 90 °C, 0.5h

**2-(((4-ethylbenzyl)amino)-5-(((4-(trifluoromethyl)benzyl)amino)methyl)-[1,2,4]triazolo[1,5-a]pyrimidin-7-ol(D2-2a).**

**Step1: 1c-S3** was synthesized using similar procedure as that used for **1a-S3**. **1c-S3** was obtained as white solid (188 mg, 66%). <sup>1</sup>H NMR (400 MHz, DMSO-*d*<sub>6</sub>) δ 7.24 (d, *J* = 8.0 Hz, 2H), 7.17-7.11 (m, 2H), 6.01 (s, 1H), 4.58 (s, 2H), 4.35 (d, *J* = 6.3 Hz, 2H), 2.56 (q, *J* = 7.6 Hz, 2H), 1.15 (t, *J* = 7.6 Hz, 3H).

**Step2:** a 10 mL round bottom flask was charged with **1c-S3** (0.100 g, 1.89 mmol) and (4-(trifluoromethyl) phenyl)methanamine (1.5 mL). After stirring for 0.5h at 90 °C, the reaction mixture was cooled to room temperature and cautiously poured over ethyl acetate. Petroleum ether was added to the reaction mixture until a precipitate is formed. The precipitate was crystallized by EtOH to afford **D2-2a** (0.065 g, 48%) as grey solid. <sup>1</sup>H NMR (400 MHz, DMSO-*d*<sub>6</sub>) δ 7.81 (s, 4H), 7.26 (d, *J* = 8.0 Hz, 2H), 7.15 (d, *J* = 8.0 Hz, 2H), 6.12 (s, 1H), 4.38 (d, *J* = 5.8 Hz, 2H), 4.31 (s, 2H), 4.11 (s, 2H), 2.56 (q, *J* = 7.6 Hz, 2H), 1.15 (t, *J* = 7.6 Hz, 3H).

**4-(((2-((4-ethylbenzyl)amino)-7-hydroxy-[1,2,4]triazolo[1,5-a]pyrimidin-5-yl)methyl)amino)methyl)benzotrile (D2-2b).** The title compound was synthesized using the same procedure as that used for **D2-2a** except that methyl 4-(aminomethyl)benzoate was used instead of (4-(trifluoromethyl)phenyl)methanamine. White solid; yield 33%. <sup>1</sup>H NMR (400 MHz, DMSO-*d*<sub>6</sub>) δ 9.99 (s, 1H), 7.98-7.88 (m, 2H), 7.80-7.72 (m, 2H), 7.26 (d, *J* = 8.0 Hz, 2H), 7.15 (d, *J* = 7.9 Hz, 2H), 6.10 (s, 1H), 4.38 (d, *J* = 4.2 Hz, 2H), 4.31 (s, 2H), 4.10 (s, 2H), 2.57 (q, *J* = 7.6 Hz, 2H), 1.15 (t, *J* = 7.6 Hz, 3H).

**5-(((2-chlorobenzyl)amino)methyl)-2-((4-ethylbenzyl)amino)-[1,2,4]triazolo[1,5-a]pyrimidin-7-ol (D2-2c).** The title compound was synthesized using the same procedure as that used for **D2-2a** except that methyl (2-chlorophenyl)methanamine was used instead of (4-(trifluoromethyl)phenyl)methanamine. White solid; yield 34%. <sup>1</sup>H NMR (400 MHz, DMSO-*d*<sub>6</sub>) δ 7.56 (dd, *J* = 1.8, 7.5 Hz, 1H), 7.42 (dd, *J* = 1.6, 7.7 Hz, 1H), 7.36 – 7.27 (m,

2H), 7.24 (d,  $J = 8.0$  Hz, 2H), 7.16 – 7.11 (m, 2H), 7.00 (t,  $J = 6.4$  Hz, 1H), 5.81 (s, 1H), 4.34 (d,  $J = 6.3$  Hz, 2H), 3.81 (s, 2H), 3.66 (s, 2H), 2.56 (q,  $J = 7.6$  Hz, 2H), 1.15 (t,  $J = 7.6$  Hz, 3H).

**2-((4-ethylbenzyl)amino)-5-(((4-fluorobenzyl)amino)methyl)-[1,2,4]triazolo[1,5-a]pyrimidin-7-ol (D2-2d).** The title compound was synthesized using the same procedure as that used for **D2-2a** except that pyridin-3-ylmethanamine was used instead of (4-fluorophenyl)methanamine. White solid; yield 33%.  $^1\text{H}$  NMR (400 MHz,  $\text{DMSO-}d_6$ )  $\delta$  7.49 – 7.41 (m, 2H), 7.24 (d,  $J = 8.0$  Hz, 2H), 7.21 – 7.14 (m, 2H), 7.12 (d,  $J = 7.9$  Hz, 2H), 6.81 (t,  $J = 6.4$  Hz, 1H), 5.67 (s, 1H), 4.34 (d,  $J = 6.3$  Hz, 2H), 3.84 (s, 2H), 3.68 (s, 2H), 2.55 (q,  $J = 7.6$  Hz, 2H), 1.15 (t,  $J = 7.6$  Hz, 3H).

**2-((4-ethylbenzyl)amino)-5-(((pyridin-3-ylmethyl)amino)methyl)-[1,2,4]triazolo[1,5-a]pyrimidin-7-ol (D2-2e).** The title compound was synthesized using the same procedure as that used for **D2-2a** except that pyridin-3-ylmethanamine was used instead of (4-(trifluoromethyl)phenyl)methanamine. White solid; yield 36%.  $^1\text{H}$  NMR (400 MHz,  $\text{DMSO-}d_6$ )  $\delta$  8.56 (d,  $J = 2.2$  Hz, 1H), 8.47 (dd,  $J = 1.7, 4.8$  Hz, 1H), 7.79 (dt,  $J = 2.0, 7.9$  Hz, 1H), 7.36 (dd,  $J = 4.8, 7.8$  Hz, 1H), 7.24 (d,  $J = 7.9$  Hz, 2H), 7.13 (d,  $J = 8.0$  Hz, 2H), 6.89 (s, 1H), 5.73 (s, 1H), 4.34 (d,  $J = 6.3$  Hz, 2H), 3.81 (s, 2H), 3.65 (s, 2H), 2.56 (q,  $J = 7.6$  Hz, 2H), 1.15 (t,  $J = 7.6$  Hz, 3H).

**2-((4-ethylbenzyl)amino)-5-(((pyridin-2-ylmethyl)amino)methyl)-[1,2,4]triazolo[1,5-a]pyrimidin-7-ol (D2-2f).** The title compound was synthesized using the same procedure as that used for **D2-2a** except that pyridin-2-ylmethanamine was used instead of (4-(trifluoromethyl)phenyl)methanamine. White solid; yield 38%.  $^1\text{H}$  NMR (400 MHz,  $\text{DMSO-}d_6$ )  $\delta$  8.57 – 8.50 (m, 1H), 7.78 (td,  $J = 1.8, 7.7$  Hz, 1H), 7.46 (d,  $J = 7.9$  Hz, 1H), 7.29 (dd,  $J = 5.0, 7.5$  Hz, 1H), 7.25 (d,  $J = 7.8$  Hz, 2H), 7.13 (d,  $J = 7.8$  Hz, 2H), 6.80 (t,  $J = 6.4$  Hz, 1H), 5.69 (s, 1H), 4.36 (d,  $J = 6.3$  Hz, 2H), 3.97 (s, 2H), 3.74 (s, 2H), 2.55 (q,  $J = 7.6$  Hz, 2H), 1.15 (t,  $J = 7.6$  Hz, 3H).

### 3. Synthesis of compound D2-3a-b and D2-4a.

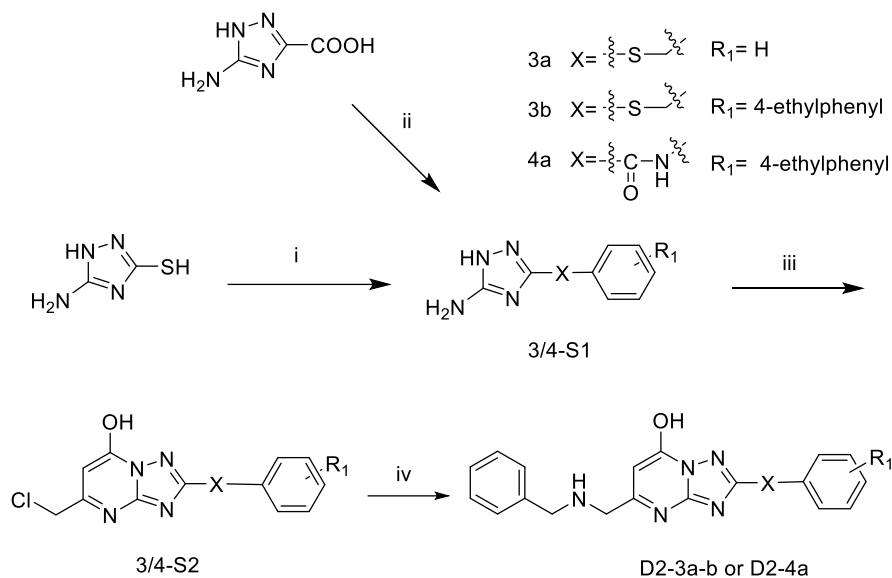

**Scheme 3. General Synthesis Methods of compound D2-2a-e.** (i)

(chloromethyl)benzene, K<sub>2</sub>CO<sub>3</sub> and KI, acetone, r.t., 4h; (ii) EDCI, HOBt, DIPEA, DMF, r.t., overnight; (iii) Ethyl-4-chloroacetoacet-ate, AcOH, 90 °C, 10h; (iv) Phenylmethanamine, 90 °C, 0.5h

**5-((benzylamino)methyl)-2-(benzylthio)-[1,2,4]triazolo[1,5-a]pyrimidin-7-ol (D2-3a).**

**Step 1:** A solution of 5-amino-1H-1,2,4-triazole-3-thiol (0.393 g, 3.00 mmol), chloromethylbenzene (0.38 ml, 3.30 mmol), Na<sub>2</sub>CO<sub>3</sub> (0.474 g, 4.50 mmol) and KI (0.048 g, 0.30 mmol) in acetone (12 mL) was stirred at room temperature for 4 h. The mixture was diluted with H<sub>2</sub>O (20 mL) and extracted with EA (3 × 10 mL), and the combined organic phases were washed with brine, dried over Na<sub>2</sub>SO<sub>4</sub>, filtered, and concentrated. Moreover, purifying with flash chromatography (20% MeOH in DCM) gives **3a-S1** as a white solid (0.390 g, 63%). <sup>1</sup>H NMR (400 MHz, DMSO-*d*<sub>6</sub>) δ 11.93 (s, 1H), 7.40-7.33 (m, 2H), 7.33-7.26 (m, 2H), 7.25-7.20 (m, 1H), 6.06 (s, 2H), 4.21 (s, 2H).

**Step 2:** To a solution of **3a-S1** (0.390 g, 1.89 mmol) in AcOH (50 mL) was added Ethyl-4-chloroacetoacet-ate (0.371 g, 2.27 mmol). After stirring for 10 h at 90 °C, the reaction mixture was cooled to room temperature and cautiously poured over ice water, obtaining a precipitate that was filtered. The precipitate was crystallized by AcOH to give **3a-S2** (0.430mg, 68%) as white solid. <sup>1</sup>H NMR (400 MHz, DMSO-*d*<sub>6</sub>) δ 7.50-7.42 (m, 2H), 7.36-7.29 (m, 2H), 7.29-7.23 (m, 1H), 6.16 (s, 1H), 4.66 (s, 2H), 4.45 (s, 2H).

**Step 3:** A 10 mL round bottom flask was charged with **3a-S2** (0.100 g, 0.33 mmol) and

phenylmethanamine (1.5 mL). After stirring for 0.5h at 90 °C, the reaction mixture was cooled to room temperature and cautiously poured over ethyl acetate. Petroleum ether was added to the reaction mixture until a precipitate is formed. The precipitate was crystallized by EtOH to afford **D2-3a** (0.074 g, 60%) as white solid. <sup>1</sup>H NMR (400 MHz, DMSO-*d*<sub>6</sub>) δ 7.54-7.48 (m, 2H), 7.43 (dtd, *J* = 2.6, 4.4, 5.5, 7.8 Hz, 5H), 7.35-7.26 (m, 2H), 7.27-7.19 (m, 1H), 5.60 (s, 1H), 4.40 (s, 2H), 4.14 (s, 2H), 3.93 (s, 2H).

**5-((benzylamino)methyl)-2-((4-ethylbenzyl)thio)-[1,2,4]triazolo[1,5-a]pyrimidin-7-ol (D2-3b).** The title compound was synthesized using the same procedure as that used for D2-3a except that 1-(chloromethyl)-4-ethylbenzene was used instead of chloromethylbenzene. White solid; yield 28%. <sup>1</sup>H NMR (400 MHz, DMSO-*d*<sub>6</sub>) δ 7.51 (dq, *J* = 2.5, 4.5 Hz, 2H), 7.43 (q, *J* = 5.9 Hz, 3H), 7.33 (d, *J* = 8.0 Hz, 2H), 7.13 (d, *J* = 7.8 Hz, 2H), 5.61 (d, *J* = 1.6 Hz, 1H), 4.36 (s, 2H), 4.15 (s, 2H), 3.94 (s, 2H), 2.56 (q, *J* = 7.6 Hz, 2H), 1.14 (t, *J* = 7.6 Hz, 3H).

**5-((benzylamino)methyl)-N-(4-ethylphenyl)-7-hydroxy-[1,2,4]triazolo[1,5-a]pyrimidin-2-carboxamide (D2-4a).**

**Step 1:** To a 100 mL round bottom flask was added 5-amino-1H-1,2,4-triazole-3-carboxylic acid (0.256 g, 2 mmol), EDCI (0.575 g, 3 mmol), HOBt (0.405 g, 3 mmol), and DMF (8 mL). The reaction was left to stir at 0 °C for 1h. To the flask was then added 4-ethylaniline (0.3 ml, 2.4 mmol) dissolved in DMF (8 mL), followed by DIPEA (1 ml, 6 mmol), and the reaction was left to stir overnight. The next day, the mixture was diluted with H<sub>2</sub>O (20 mL) and extracted with EA (3 × 10 mL), and the combined organic phases were washed with brine, dried over Na<sub>2</sub>SO<sub>4</sub>, filtered, and concentrated. Moreover, purifying with flash chromatography (10% MeOH and 1% TEA in DCM) gives **4a-S1** as a white solid (0.200 g, 43%). <sup>1</sup>H NMR (400 MHz, DMSO-*d*<sub>6</sub>) δ 12.68 (s, 1H), 9.85 (s, 1H), 7.84-7.54 (m, 2H), 7.35-7.07 (m, 2H), 6.14 (s, 2H), 2.56 (q, *J* = 7.6 Hz, 2H), 1.16 (t, *J* = 7.6 Hz, 3H).

**Step 2 and Step 3** was same as the procedures of **D2-3a** except that **4a-S1** and **4a-S2** were used instead of **3a-S1** and **3a-S2**. **D2-4a** was obtained as white solid (72 mg, 60%). <sup>1</sup>H NMR (400 MHz, DMSO-*d*<sub>6</sub>) δ 10.22 (s, 1H), 7.78-7.68 (m, 2H), 7.59-7.50 (m, 2H), 7.48-7.39 (m, 3H), 7.22-7.14 (m, 2H), 5.73 (s, 1H), 4.22 (s, 2H), 4.03 (s, 2H), 2.57 (t, *J* =



7.6 Hz, 2H), 1.18 (t,  $J = 7.6$  Hz, 3H).

#### 4. Synthesis of FDW028-PEG6-biotin.

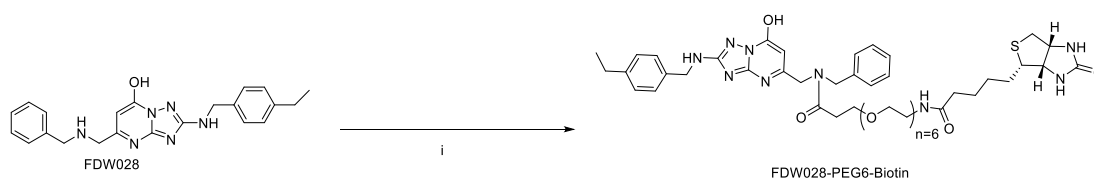

**Scheme 4.** Synthesis of FDW028-PEG6-biotin. (i) Biotin-PEG6-acid, EDCI, HOBt, DIPEA, DMF, r.t., 10 h.

**Step 1:** To a 10 mL round bottom flask was added Biotin-PEG6-acid (0.148g, 0.26 mmol), EDCI (0.064 mg, 0.38 mmol), HOBt (0.052g, 0.38mol), and DMF (7mL). The reaction was left to stir at 0 °C for 1h. To the flask was then added **FDW028** (0.100g, 0.26 mmol) dissolved in DMF (3 mL), followed by DIPEA (0.100 g, 0.78 mmol), and the reaction was left to stir overnight. The next day, the mixture was diluted with H<sub>2</sub>O (10 mL) and extracted with EA (3 × 10 mL), and the combined organic phases were washed with brine, dried over Na<sub>2</sub>SO<sub>4</sub>, filtered, and concentrated. Then, purify with flash chromatography (10% MeOH in DCM) gives **FDW028-PEG6-biotin** as light yellow oil (0.020g, 8%). LCMS (ESI) m/z: calculated for C<sub>47</sub>H<sub>67</sub>N<sub>9</sub>O<sub>10</sub>S [M + H]<sup>+</sup> 950.5 found 949.7, calculated for C<sub>47</sub>H<sub>67</sub>N<sub>9</sub>O<sub>10</sub>S [M+Na]<sup>+</sup> 972.5 found 971.7, calculated for C<sub>47</sub>H<sub>67</sub>N<sub>9</sub>O<sub>10</sub>S [M-H]<sup>-</sup> 948.5 found 947.7.

## TABLES

**Table S1** The primers utilized for qPCR assays.

| Gene   | Forward primer (5'→3')  | Reverse primer (5'→3')    |
|--------|-------------------------|---------------------------|
| FUT1   | GTGCCCGTATCCAGAGTGAT    | AGGACCCAGGGGAGAGTAAA      |
| FUT2   | CTACCACCTGAACGACTGGATG  | AGGGTGAACCTCTGGAGGATCT    |
| FUT3   | GCCGACCGCAAGGTGTAC      | TGACTTAGGGTTGGACATGATATCC |
| FUT4   | TCCTACGGAGAGGCTCAG      | TCCTCGTAGTCCAACACG        |
| FUT5   | TATGGCAGTGGAACCTGTCA    | CGTCCACAGCAGGATCAGTA      |
| FUT6   | CATTTCTGCTGCCTCAGG      | GGGCAAGTCAGGCAACTC        |
| FUT7   | GAGAATCTCGGGTCTCTTGG    | CAGACAAGGATGGTGATCGTG     |
| FUT8   | GACAGAACTGGTTCAGCGGAGA  | GCAGTAGACCACATGATGGAGC    |
| FUT9   | CACCGAGACATCAGTTGGGATCT | CTTGGATATCTGAATCACGGCGG   |
| FUT10  | ATCTTGCCTGTGCGTCAC      | ATGCGTAGGTGCTTCCTC        |
| FUT11  | CTCTTGGCTTTCTTGTC       | ATGACGGAGTGATTGTTC        |
| POFUT1 | CCAGCATCACAAGCCTCCTTT   | CTCTGGCTCCATTGTTCTCTGT    |
| POFUT2 | TTCACGACCACTATGGAGG     | CGGAGCCCAGCTTGACCTT       |
| HSC70  | GCTATGTCGCCTTTACGGACA   | GCCAGCATCATTACCACCATA     |
| LAMP2A | GTTTCAGTGTCTGGAGCATTTTC | GCACAAGGAAGTTGTCGTCA      |
| GAPDH  | TGCACCACCAACTGCTTAGC    | GGCATGGACTGTGGTCATGAG     |

**Table S2** LC-MS/MS analysis of the proteins pulled down by B7-H3 in SW480 cells.

| Accession  | Protein Name | # AAs | MW [kDa] | Area     | emPAI | Score Sequest HT | Coverage Sequest HT |
|------------|--------------|-------|----------|----------|-------|------------------|---------------------|
| O75688     | PPM1B        | 479   | 52.609   | 1.70E+07 | 0.532 | 17.65069282      | 9.603340292         |
| Q5ZPR3     | CD276        | 534   | 57.199   | 1.10E+07 | 0.274 | 11.84529543      | 5.243445693         |
| Q16629     | SRSF7        | 238   | 27.35    | 9.10E+06 | 0.155 | 3.829475522      | 3.781512605         |
| P11166     | SLC2A1       | 492   | 54.049   | 8.40E+06 | 0.145 | 0                | 2.032520325         |
| P02647     | APOA1        | 267   | 30.759   | 6.90E+06 | 0.389 | 8.031313896      | 4.119850187         |
| E9PR30     | FAU          | 98    | 10.898   | 5.80E+06 | 0.468 | 2.288972139      | 10.20408163         |
| Q9BQA1     | WDR77        | 342   | 36.701   | 5.50E+06 | 0.389 | 10.3725183       | 8.479532164         |
| C9JC84     | FGG          | 461   | 52.304   | 4.70E+06 | 0.083 | 1.717566609      | 1.952277657         |
| A0A0U1RRH7 | Histone H2A  | 170   | 18.541   | 4.60E+06 | 0.233 | 4.21283412       | 5.294117647         |
| P61254     | RPL26        | 145   | 17.248   | 4.50E+06 | 0.292 | 1.791257858      | 6.206896552         |
| P04085     | PDGFA        | 211   | 24.028   | 4.30E+06 | 0.233 | 1.734282494      | 3.791469194         |
| P19474     | TRIM21       | 475   | 54.135   | 4.30E+06 | 0.16  | 6.298930645      | 3.789473684         |
| O14744     | PRMT5        | 637   | 72.638   | 3.90E+06 | 0.129 | 6.516376853      | 2.982731554         |
| P02649     | APOE         | 317   | 36.132   | 3.70E+06 | 0.096 | 3.703071833      | 2.839116719         |
| U3KQK0     | HIST1H2BN    | 166   | 18.792   | 3.40E+06 | 0.425 | 1.781346083      | 14.45783133         |
| Q9NZT1     | CALML5       | 146   | 15.883   | 3.00E+06 | 0.292 | 1.781986237      | 5.479452055         |
| P68371     | TUBB4B       | 445   | 49.799   | 2.90E+06 | 0.35  | 8.636849165      | 9.213483146         |
| P02545     | LMNA         | 664   | 74.095   | 2.80E+06 | 0.053 | 4.37276423       | 1.355421687         |
| Q5T749     | KPRP         | 579   | 64.093   | 2.70E+06 | 0.105 | 4.417414427      | 1.554404145         |
| Q9BRL6     | SRSF8        | 282   | 32.268   | 2.50E+06 | 0.179 | 1.676411867      | 2.836879433         |
| P07437     | TUBB         | 444   | 49.639   | 2.40E+06 | 0.35  | 8.648949862      | 9.234234234         |
| A0A2U3TZH3 | EEF1A2       | 496   | 54.306   | 2.20E+06 | 0.292 | 5.615974665      | 5.241935484         |
| P05783     | KRT18        | 430   | 48.029   | 2.00E+06 | 0.359 | 4.020526528      | 6.279069767         |

| Accession  | Protein Name | # AAs | MW [kDa] | Area     | emPAI | Score Sequest HT | Coverage Sequest HT |
|------------|--------------|-------|----------|----------|-------|------------------|---------------------|
| H3BSS5     | KCTD5        | 246   | 27.109   | 2.00E+06 | 0.166 | 1.965274334      | 4.87804878          |
| P62937     | PPIA         | 165   | 18.001   | 2.00E+06 | 0.179 | 1.894652247      | 8.484848485         |
| P26373     | RPL13        | 211   | 24.247   | 1.70E+06 | 0.389 | 3.734298706      | 8.530805687         |
| P07355     | ANXA2        | 339   | 38.58    | 1.70E+06 | 0.101 | 2.231539488      | 2.654867257         |
| Q15393     | SF3B3        | 1217  | 135.492  | 1.60E+06 | 0.036 | 2.378240108      | 0.986031224         |
| P11142     | HSPA8        | 646   | 70.854   | 1.60E+06 | 0.061 | 4.249559402      | 2.012383901         |
| B7Z4C8     | RPL31        | 130   | 15.109   | 1.60E+06 | 0.334 | 0                | 6.923076923         |
| O95881     | TXNDC12      | 172   | 19.194   | 1.40E+06 | 0.194 | 0                | 5.23255814          |
| P21333     | FLNA         | 2647  | 280.564  | 1.40E+06 | 0.031 | 4.847812653      | 0.98224405          |
| P09651     | HNRNPA1      | 372   | 38.723   | 1.40E+06 | 0.122 | 1.812566996      | 2.688172043         |
| E9PK25     | CFL1         | 204   | 22.714   | 1.30E+06 | 0.179 | 0                | 5.392156863         |
| P14618     | PKM          | 531   | 57.9     | 1.20E+06 | 0.064 | 1.674449205      | 1.506591337         |
| Q9Y3U8     | RPL36        | 105   | 12.246   | 1.10E+06 | 0.468 | 0                | 9.523809524         |
| P62258     | YWHAE        | 255   | 29.155   | 9.70E+05 | 0.136 | 0                | 3.921568627         |
| Q02878     | RPL6         | 288   | 32.708   | 9.60E+05 | 0.129 | 1.602821469      | 3.125               |
| P83731     | RPL24        | 157   | 17.768   | 9.50E+05 | 0.259 | 0                | 5.732484076         |
| P15924     | DSP          | 2871  | 331.569  | 8.70E+05 | 0.011 | 1.699917436      | 0.313479624         |
| P81605     | DCD          | 110   | 11.277   | 8.50E+05 | 0.292 | 1.832010746      | 10.90909091         |
| Q7RTV0     | PHF5A        | 110   | 12.397   | 8.40E+05 | 0.334 | 2.178889513      | 11.81818182         |
| P14923     | JUP          | 745   | 81.693   | 7.50E+05 | 0.054 | 2.451729059      | 1.879194631         |
| P54105     | CLNS1A       | 237   | 26.199   | 7.20E+05 | 0.233 | 1.891435623      | 5.485232068         |
| P62269     | RPS18        | 152   | 17.708   | 6.10E+05 | 0.212 | 1.611881495      | 7.236842105         |
| A0A3B3ITT5 | RPL29        | 167   | 18.5     | 5.40E+05 | 0.389 | 0                | 4.790419162         |
| Q02543     | RPL18A       | 176   | 20.749   | 4.90E+05 | 0.179 | 1.968677998      | 7.386363636         |
| Q14240     | EIF4A2       | 407   | 46.373   | 4.60E+05 | 0.101 | 0                | 2.457002457         |

| Accession | Protein Name | # AAs | MW [kDa] | Area | emPAI | Score Sequest HT | Coverage Sequest HT |
|-----------|--------------|-------|----------|------|-------|------------------|---------------------|
| P07900    | HSP90AA1     | 732   | 84.607   |      | 0.056 | 2.138608217      | 2.049180328         |
| O75367    | H2AFY        | 372   | 39.592   |      | 0.129 | 0                | 7.795698925         |

**Table S3** Compound D2 and its derivatives.

| Compound ID    | Structure |
|----------------|-----------|
| D2-1a          |           |
| D2-1b          |           |
| D2-1c (FDW028) |           |
| D2-1d          |           |
| D2-1e          |           |
| D2-1f          |           |
| D2-1g          |           |
| D2-2a          |           |
| D2-2b          |           |
| D2-2c          |           |
| D2-2d          |           |
| D2-2e          |           |
| D2-2f          |           |
| D2-3a          |           |

| Compound ID | Structure                                                                                                                                  |
|-------------|--------------------------------------------------------------------------------------------------------------------------------------------|
| D2-3b       | 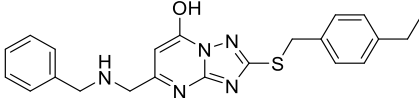 <chem>CC1=CC=C(C=C1)CS2=CN(CCN3C=CC=C3)N=N2</chem>      |
| D2-4a       |  <chem>CC1=CC=C(C=C1)NC(=O)C2=CN(CCN3C=CC=C3)N=N2</chem> |

## Figures

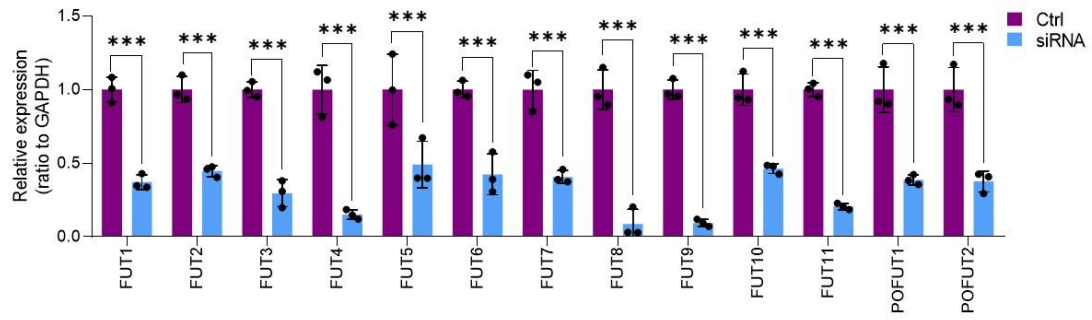

**Figure S1** Validation of siRNAs of FUTs.



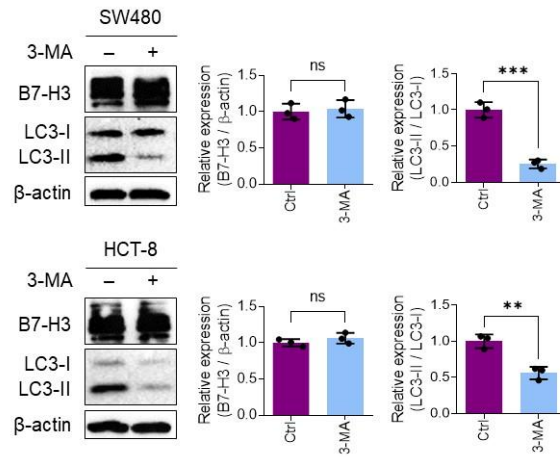

**Figure S2** Immunoblots of B7-H3 in SW480 and HCT-8 cells with the treatment of 3-MA.



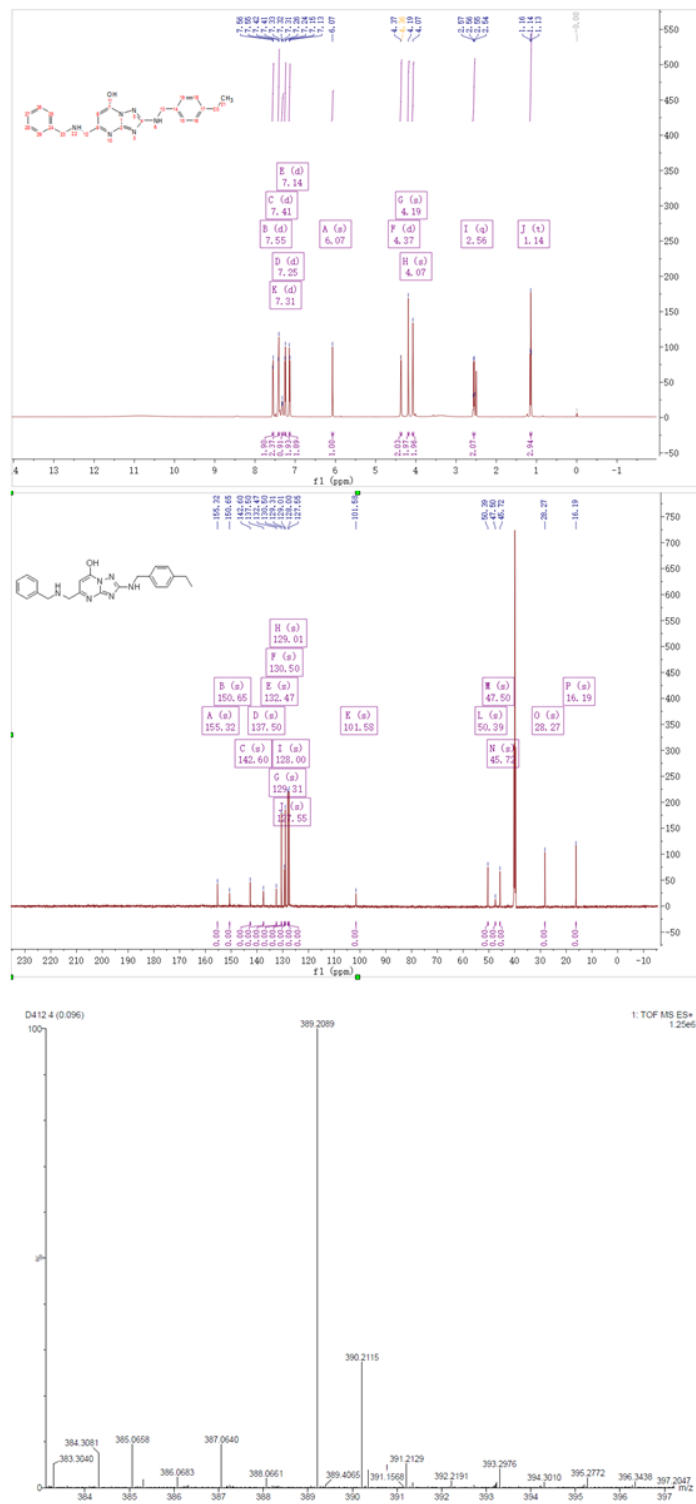

**Figure S4** <sup>1</sup>H NMR spectrum, <sup>13</sup>C NMR spectrum, and HRMS of FDW028.

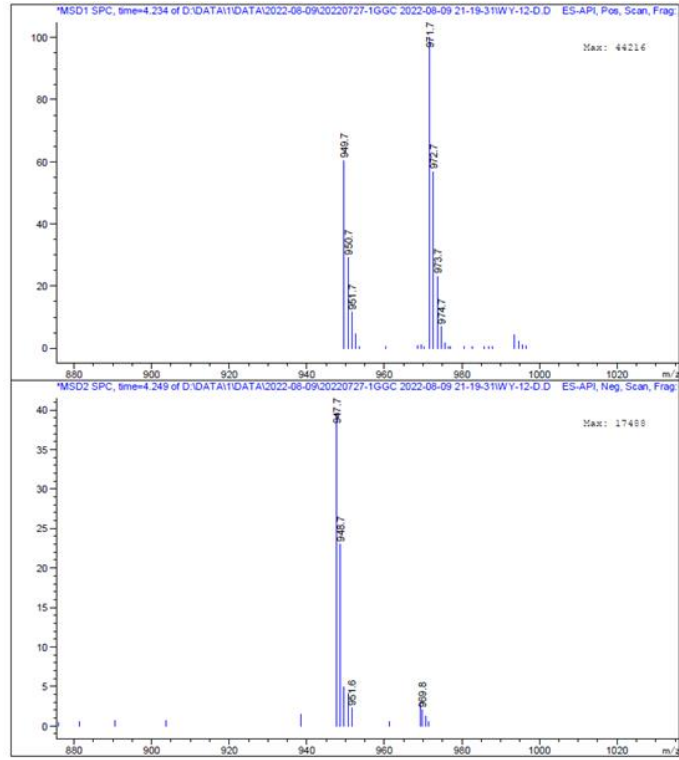

**Figure S5** The MS spectrum of FDW028-PEG6-biotin.

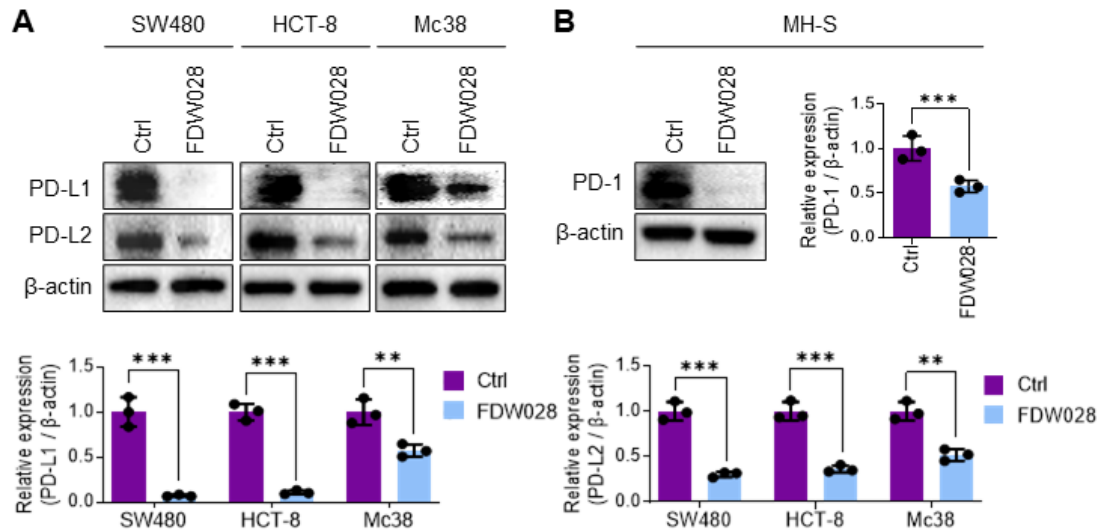

**Figure S6** The effect of FDW028 on the expression of PD-L1/2 and PD-1. **A** Immunoblots of PD-L1 and PD-L2 in SW480, HCT-8 and Mc38 cells treated with FDW028 at 50  $\mu$ M for 72 h. **B** Immunoblots of PD-1 in MH-S cells treated with FDW028 at 50  $\mu$ M for 72 h. All experiments were performed in technical triplicates and are displayed as mean  $\pm$  s.d.; \*\*,  $P < 0.01$ ; \*\*\*,  $P < 0.001$ .
